# Supplementary material for: Prospective, randomized, multicenter study of intraosseous basivertebral nerve ablation for the treatment of chronic low back pain: 12-month results
Source: PubMed Central journal article supplement — Reg Anesth Pain Med. 2021 May 24;46(8):683–93. doi: 10.1136/rapm-2020-102259 (PMC8311085; doi:10.1136/rapm-2020-102259), 2021-05-24
Supplement: rapm-2020-102259supp001.pdf [file rapm-2020-102259supp001.pdf]

**Supplemental Table 1 – Unadjusted Primary Endpoint Results**

The below table reports the unadjusted primary endpoint results (no adjustment for baseline values) for Oswestry Disability Index (ODI) and Visual Analog Scale (VAS) between the arms at 3 and 6-months.

| <b>Oswestry Disability Index (ODI)</b>              | <b>Basivertebral Nerve<br/>Ablation Arm<br/>(N=66)</b> | <b>Standard Care<br/>Arm<br/>(N=74)</b> | <b>Difference<br/>Between Arms</b> | <b>P-Value</b>       |
|-----------------------------------------------------|--------------------------------------------------------|-----------------------------------------|------------------------------------|----------------------|
| <b>Baseline ODI</b> Mean, SD (Range)                | 44.7, 11.3 (30 to 76)                                  | 46.9, 11.7 (30 to 88)                   |                                    | 0.30 <sup>a</sup>    |
| <b>3-Month ODI</b>                                  | N=66 <sup>b</sup>                                      | N=74 <sup>b</sup>                       |                                    |                      |
| Mean, SD (Range) <sup>c</sup>                       | 21.0, 15.9 (0 to 62)                                   | 42.3, 15.8 (7 to 75)                    |                                    |                      |
| Mean change from baseline (95% CI)                  | -23.7 (-27.7, -19.7)                                   | -4.6 (-9.0, -0.2)                       |                                    | <0.001 <sup>d</sup>  |
| Difference from standard care arm in means (95% CI) |                                                        |                                         | -19.0 (-24.9, -13.1)               | <0.001 <sup>e</sup>  |
| <b>6-Month ODI</b>                                  | N=61 <sup>f</sup>                                      | N=72 <sup>g</sup>                       |                                    |                      |
| Mean, SD (Range) <sup>c</sup>                       | 19.1, 15.4 (0 to 56)                                   | 44.8, 14.3 (6 to 76)                    |                                    |                      |
| Mean change from baseline (95% CI)                  | -25.1 (-29.1, -21.1)                                   | -2.4 (-6.1, 1.2)                        |                                    | <0.001 <sup>d</sup>  |
| Difference from standard care arm in means (95% CI) |                                                        |                                         | -22.7 (-28.1, -17.3)               | <0.0001 <sup>e</sup> |
| <b>Baseline VAS</b> Mean, SD (Range)                | 6.7, 1.3 (4 to 10)                                     | 6.9, 1.3 (4 to 10)                      |                                    | 0.61 <sup>a</sup>    |
| <b>3-Month VAS</b>                                  | N=66 <sup>b</sup>                                      | N=51 <sup>b</sup>                       |                                    |                      |
| Mean, SD (Range) <sup>c</sup>                       | 3.2, 2.7 (0 to 10)                                     | 5.8, 2.2 (0 to 10)                      |                                    |                      |
| Mean change from baseline (95% CI)                  | -3.5 (-4.1, -2.9)                                      | -1.1 (-1.7, -0.4)                       |                                    | <0.001 <sup>d</sup>  |
| Difference from standard care arm in means (95% CI) |                                                        |                                         | -2.5 (-3.4, -1.6)                  | <0.001 <sup>e</sup>  |

| <b>6-Month VAS</b>                                  | N=60 <sup>f</sup> | N=70 <sup>g</sup>  |                   |                     |
|-----------------------------------------------------|-------------------|--------------------|-------------------|---------------------|
| Mean, SD (Range) <sup>e</sup>                       | 3.1, 2.4 (0 to 8) | 6.5, 1.8 (1 to 10) |                   |                     |
| Mean change from baseline (95% CI)                  | -3.5 (-4.1, -3.0) | -0.4 (-0.9, 0.2)   |                   | <0.001 <sup>d</sup> |
| Difference from standard care arm in means (95% CI) |                   |                    | -3.2 (-3.9, -2.4) | <0.001 <sup>e</sup> |

Abbreviations: ODI, Oswestry Disability Index; SD, standard deviation; CI, confidence interval

<sup>a</sup>P-value from a two-sample t-test with a factor of treatment group. Testing between randomized arms.

<sup>b</sup>Multiple imputation used to impute missing values. Values have been adjusted for multiple imputation.

<sup>c</sup>Summary statistics represent average values, obtained by averaging the summary statistics generated from each imputed dataset.

<sup>d</sup>P-value from a paired t-test on the RF Ablation Arm.

<sup>e</sup>Estimates and p-value from an ANOVA with a factor of treatment group.

<sup>f</sup>As observed. No imputations for missing values.

<sup>g</sup>Standard care control arm 6-month last attended visit (median of 176.5 days). No imputations for missing data.

Note: Visits are computed as post-treatment for the RF Ablation Arm, and post-randomization for the Control Arm.
