# Supplementary material for: Prospective, randomized, multicenter study of intraosseous basivertebral nerve ablation for the treatment of chronic low back pain: 12-month results
Source: PubMed Central journal article supplement — Reg Anesth Pain Med. 2021 May 24;46(8):683–93. doi: 10.1136/rapm-2020-102259 (PMC8311085; doi:10.1136/rapm-2020-102259), 2021-05-24
Supplement: rapm-2020-102259supp002.pdf [file rapm-2020-102259supp002.pdf]

|                                                                                                                               |   |
|-------------------------------------------------------------------------------------------------------------------------------|---|
| <a href="#">Table 39.AH3: Analysis of Change from Baseline in Oswestry Disability Index (ODI) by Visit (ITT Population)</a>   | 2 |
| <a href="#">Table 42.AH3: Secondary Analysis: Change from Baseline in Visual Analog Scale (VAS) by Visit (ITT Population)</a> | 4 |
| <a href="#">Table 48.AH3: Healthcare Utilization Outcomes (ITT Population)</a>                                                | 6 |

Table 39.AH3: Analysis of Change from Baseline in Oswestry Disability Index (ODI) by Visit  
(ITT Population)  
(Page 1 of 2)

|                                                              | RF Ablation Arm<br>(N=66) | Control Arm<br>(N=74) |
|--------------------------------------------------------------|---------------------------|-----------------------|
| Baseline ODI Total Score                                     |                           |                       |
| N                                                            | 66                        | 74                    |
| Mean                                                         | 44.7                      | 46.9                  |
| SD                                                           | 11.30                     | 11.67                 |
| Median                                                       | 40.0                      | 46.0                  |
| Min. to Max.                                                 | 30 to 76                  | 30 to 88              |
| 3 Month <sup>a</sup> ODI Total Score                         |                           |                       |
| N                                                            | 66                        | 74                    |
| Mean <sup>b</sup>                                            | 21.0                      | 42.3                  |
| SD <sup>b</sup>                                              | 15.95                     | 15.81                 |
| Median <sup>b</sup>                                          | 18.8                      | 40.5                  |
| Min. to Max. <sup>b</sup>                                    | 0 to 62                   | 7 to 75               |
| ODI Total Score Change from Baseline to 3 Month <sup>a</sup> |                           |                       |
| N                                                            | 66                        | 74                    |
| Mean <sup>b</sup>                                            | -23.7                     | -4.6                  |
| SD <sup>b</sup>                                              | 17.96                     | 15.01                 |
| Median <sup>b</sup>                                          | -25.6                     | -2.1                  |
| Min. to Max. <sup>b</sup>                                    | -70 to 12                 | -64 to 29             |
| Paired t-test P-value <sup>c</sup>                           | <0.001                    |                       |

|                                                                             |                        |                     |
|-----------------------------------------------------------------------------|------------------------|---------------------|
| Mean (95% Confidence Interval) <sup>d</sup>                                 | -23.7 (-27.7 to -19.7) | -4.6 (-9.0 to -0.2) |
| Difference from Control Arm in Means (95% Confidence Interval) <sup>d</sup> | -19.0 (-24.9 to -13.1) |                     |
| ANOVA P-value <sup>d</sup>                                                  | <0.001                 |                     |

<sup>a</sup> Multiple imputation used to impute missing values. Values have been adjusted for multiple imputation.

<sup>b</sup> Summary statistics represent average values, obtained by averaging the summary statistics generated from each imputed dataset.

<sup>c</sup> P-value from a paired t-test on the RF Ablation Arm.

<sup>d</sup> Estimates and p-value from an ANOVA with a factor of treatment group.

Note: Visits are computed as post-treatment for the RF Ablation Arm, and post-randomization for the Control Arm.

SOURCE: RTANIS\Relieva\CIP\_0006\12\_Month\_Analysis\Analysis\iprim\_ah3 (Mar 5, 2021 12:42)

Table 39.AH3: Analysis of Change from Baseline in Oswestry Disability Index (ODI) by Visit  
(ITT Population)  
(Page 2 of 2)

|                                                                                                     | RF Ablation Arm<br>(N=66) | Control Arm<br>(N=74) |
|-----------------------------------------------------------------------------------------------------|---------------------------|-----------------------|
| 6 Month (RF Ablation Arm)/Last Attended Visit (Control Arm) ODI Total Score                         |                           |                       |
| N                                                                                                   | 61                        | 72                    |
| Mean                                                                                                | 19.1                      | 44.8                  |
| SD                                                                                                  | 15.38                     | 14.30                 |
| Median                                                                                              | 16.0                      | 46.0                  |
| Min. to Max.                                                                                        | 0 to 56                   | 6 to 76               |
| ODI Total Score Change from Baseline to 6 Month (RF Ablation Arm)/Last Attended Visit (Control Arm) |                           |                       |
| N                                                                                                   | 61                        | 72                    |
| Mean                                                                                                | -25.1                     | -2.4                  |
| SD                                                                                                  | 17.35                     | 14.29                 |
| Median                                                                                              | -24.0                     | -1.0                  |
| Min. to Max.                                                                                        | -60 to 6                  | -62 to 20             |
| Paired t-test P-value <sup>c</sup>                                                                  | <0.001                    |                       |
| Mean (95% Confidence Interval) <sup>d</sup>                                                         | -25.1 (-29.1 to -21.1)    | -2.4 (-6.1 to 1.2)    |
| Difference from Control Arm in Means (95% Confidence Interval) <sup>d</sup>                         | -22.7 (-28.1 to -17.3)    |                       |
| ANOVA P-value <sup>d</sup>                                                                          | <.0001                    |                       |

<sup>a</sup> Multiple imputation used to impute missing values. Values have been adjusted for multiple imputation.

<sup>b</sup> Summary statistics represent average values, obtained by averaging the summary statistics generated from each imputed dataset.

<sup>c</sup> P-value from a paired t-test on the RF Ablation Arm.

<sup>d</sup> Estimates and p-value from an ANOVA with a factor of treatment group.

Note: Visits are computed as post-treatment for the RF Ablation Arm, and post-randomization for the Control Arm.

SOURCE: RTANIS\Relievan\CIP\_0006\12\_Month\_Analysis\Analysis\iprim\_ah3 (Mar 5, 2021 12:42)

Table 42.AH3: Secondary Analysis: Change from Baseline in Visual Analog Scale (VAS) by Visit  
(ITT Population)  
(Page 1 of 2)

|                                                                             | RF Ablation Arm<br>(N=66) | Control Arm<br>(N=74)  |
|-----------------------------------------------------------------------------|---------------------------|------------------------|
| 3 Month VAS Score                                                           |                           |                        |
| N                                                                           | 66                        | 51                     |
| Mean                                                                        | 3.21                      | 5.77                   |
| SD                                                                          | 2.692                     | 2.157                  |
| Median                                                                      | 2.50                      | 6.00                   |
| Min. to Max.                                                                | 0.0 to 10.0               | 0.0 to 10.0            |
| VAS Score Change from Baseline to 3 Month                                   |                           |                        |
| N                                                                           | 66                        | 51                     |
| Mean                                                                        | -3.53                     | -1.06                  |
| SD                                                                          | 2.627                     | 2.067                  |
| Median                                                                      | -4.00                     | -1.00                  |
| Min. to Max.                                                                | -8.0 to 2.0               | -6.5 to 3.0            |
| Paired t-test P-value <sup>a</sup>                                          | <0.001                    |                        |
| Mean (95% Confidence Interval) <sup>b</sup>                                 | -3.53 (-4.11 to -2.94)    | -1.06 (-1.73 to -0.40) |
| Difference from Control Arm in Means (95% Confidence Interval) <sup>b</sup> | -2.47 (-3.35 to -1.58)    |                        |
| ANOVA P-value <sup>b</sup>                                                  | <0.001                    |                        |
| VAS Responder Rates                                                         |                           |                        |
| Subjects with ≥ 1.5-point VAS decrease                                      | 49 ( 74.2%)               | 18 ( 35.3%)            |
| Fisher's Exact Test P-value                                                 | <0.001                    |                        |
| Subjects with ≥ 2.0-point VAS decrease                                      | 48 ( 72.7%)               | 17 ( 33.3%)            |
| Fisher's Exact Test P-value                                                 | <0.001                    |                        |

<sup>a</sup> P-value from a paired t-test on the RF Ablation Arm.

<sup>b</sup> Estimates and p-value from ANOVA with a factor of treatment group.

Note: Visits are computed as post-treatment for the RF Ablation Arm, and post-randomization for the Control Arm.

SOURCE: RTANIS\Relievan\CIP\_0006\12\_Month\_Analysis\Analysis\isecvas\_ah3 (Mar 5, 2021 13:13)

Table 42.AH3: Secondary Analysis: Change from Baseline in Visual Analog Scale (VAS) by Visit  
(ITT Population)  
(Page 2 of 2)

|                                                                                               | RF Ablation Arm<br>(N=66) | Control Arm<br>(N=74) |
|-----------------------------------------------------------------------------------------------|---------------------------|-----------------------|
| 6 Month (RF Ablation Arm)/Last Attended Visit (Control Arm) VAS Score                         |                           |                       |
| N                                                                                             | 60                        | 70                    |
| Mean                                                                                          | 3.13                      | 6.46                  |
| SD                                                                                            | 2.442                     | 1.782                 |
| Median                                                                                        | 3.00                      | 7.00                  |
| Min. to Max.                                                                                  | 0.0 to 8.0                | 1.0 to 10.0           |
| VAS Score Change from Baseline to 6 Month (RF Ablation Arm)/Last Attended Visit (Control Arm) |                           |                       |
| N                                                                                             | 60                        | 70                    |
| Mean                                                                                          | -3.54                     | -0.37                 |
| SD                                                                                            | 2.506                     | 1.935                 |
| Median                                                                                        | -4.00                     | 0.00                  |
| Min. to Max.                                                                                  | -8.0 to 1.0               | -7.0 to 4.0           |
| Paired t-test P-value <sup>a</sup>                                                            | <0.001                    |                       |
| Mean (95% Confidence Interval) <sup>b</sup>                                                   | -3.54 (-4.11 to -2.98)    | -0.37 (-0.90 to 0.15) |
| Difference from Control Arm in Means (95% Confidence Interval) <sup>b</sup>                   | -3.17 (-3.94 to -2.40)    |                       |
| ANOVA P-value <sup>b</sup>                                                                    | <0.001                    |                       |
| VAS Responder Rates                                                                           |                           |                       |
| Subjects with ≥ 1.5-point VAS decrease                                                        | 48 ( 80.0%)               | 12 ( 17.1%)           |
| Fisher's Exact Test P-value                                                                   | <0.001                    |                       |
| Subjects with ≥ 2.0-point VAS decrease                                                        | 45 ( 75.0%)               | 12 ( 17.1%)           |
| Fisher's Exact Test P-value                                                                   | <0.001                    |                       |



<sup>a</sup> P-value from a paired t-test on the RF Ablation Arm.

<sup>b</sup> Estimates and p-value from ANOVA with a factor of treatment group.

Note: Visits are computed as post-treatment for the RF Ablation Arm, and post-randomization for the Control Arm.

SOURCE: RTANIS\Relievan\CIP\_0006\12\_Month\_Analysis\Analysis\isecvas\_ah3 (Mar 5, 2021 13:13)

Table 48.AH3: Healthcare Utilization Outcomes  
(ITT Population)

|                                                                          | RF Ablation Arm<br>(N=66) | Control Arm<br>(N=74) | P-value            |
|--------------------------------------------------------------------------|---------------------------|-----------------------|--------------------|
| <b>Opioid Use</b>                                                        |                           |                       |                    |
| n                                                                        | 65                        | 52                    |                    |
| Subjects Not Taking Opioids at Baseline, Not Taking Opioids at 3 Months  | 43 ( 66.2%)               | 39 ( 75.0%)           | 0.394 <sup>a</sup> |
| Subjects Not Taking Opioids at Baseline, Taking Opioids at 3 Months      | 3 ( 4.6%)                 | 0                     |                    |
| Subjects Taking Opioids at Baseline, Not Taking Opioids at 3 Months      | 2 ( 3.1%)                 | 1 ( 1.9%)             |                    |
| Subjects Taking Opioids at Baseline, Taking Opioids at 3 Months          | 17 ( 26.2%)               | 12 ( 23.1%)           |                    |
| n                                                                        | 61                        | 66                    |                    |
| Subjects Not Taking Opioids at Baseline, Not Taking Opioids at 6 Months  | 40 ( 65.6%)               | 50 ( 75.8%)           | 0.560 <sup>a</sup> |
| Subjects Not Taking Opioids at Baseline, Taking Opioids at 6 Months      | 2 ( 3.3%)                 | 1 ( 1.5%)             |                    |
| Subjects Taking Opioids at Baseline, Not Taking Opioids at 6 Months      | 4 ( 6.6%)                 | 2 ( 3.0%)             |                    |
| Subjects Taking Opioids at Baseline, Taking Opioids at 6 Months          | 15 ( 24.6%)               | 13 ( 19.7%)           |                    |
| n                                                                        | 60                        |                       |                    |
| Subjects Not Taking Opioids at Baseline, Not Taking Opioids at 9 Months  | 39 ( 65.0%)               |                       | 0.655 <sup>b</sup> |
| Subjects Not Taking Opioids at Baseline, Taking Opioids at 9 Months      | 2 ( 3.3%)                 |                       |                    |
| Subjects Taking Opioids at Baseline, Not Taking Opioids at 9 Months      | 3 ( 5.0%)                 |                       |                    |
| Subjects Taking Opioids at Baseline, Taking Opioids at 9 Months          | 16 ( 26.7%)               |                       |                    |
| n                                                                        | 61                        |                       |                    |
| Subjects Not Taking Opioids at Baseline, Not Taking Opioids at 12 Months | 40 ( 65.6%)               |                       | 0.414 <sup>b</sup> |
| Subjects Not Taking Opioids at Baseline, Taking Opioids at 12 Months     | 2 ( 3.3%)                 |                       |                    |
| Subjects Taking Opioids at Baseline, Not Taking Opioids at 12 Months     | 4 ( 6.6%)                 |                       |                    |
| Subjects Taking Opioids at Baseline, Taking Opioids at 12 Months         | 15 ( 24.6%)               |                       |                    |

<sup>a</sup> P-value from a Chi-Square Test of Equal Proportions.

<sup>b</sup> P-value from a McNemar's test.

Note: Visits are computed as post-treatment for the RF Ablation Arm, and post-randomization for the Control Arm.

SOURCE: RTANIS\Relievan\CIP\_0006\12\_Month\_Analysis\Analysis\ihlthut\_ah3 (Mar 19, 2021 14:41)
